# Supplementary material for: MdPP2C24/37, Protein Phosphatase Type 2Cs from Apple, Interact with MdPYL2/12 to Negatively Regulate ABA Signaling in Transgenic Arabidopsis
Source: MDPI journal article supplement (doi:10.3390/ijms232214375), 2022-11-19
Supplement: s1 [file s1]

## Supplementary Materials

**Figure S1.** The phylogenetic tree analysis of MdPP2C24/37.

**Figure S2.** Identification of the *MdPP2C24/37* overexpression lines in *Arabidopsis*.

**Figure S3.** Phenotypic analysis of overexpression of *MdPP2C24/37* in *Arabidopsis* found that it has a hyposensitive phenotype to ABA or mannitol at seedling establishment stage.

**Figure S4.** Positive control and negative results using bimolecular fluorescence complementation (BiFC) assay of this study.

## Supplemental Table S1 List of Primers Used in This Study.

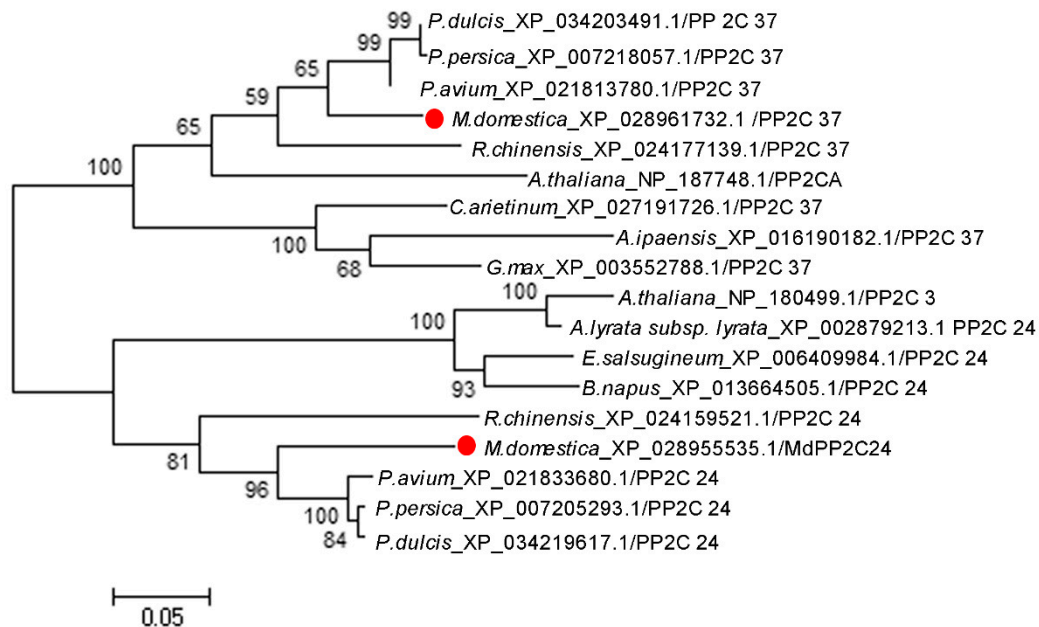

**Figure S1.** The phylogenetic tree analysis of MdPP2C24/37. The phylogenetic tree of PP2Cs was generated based on the alignment of the full-length PP2Cs protein sequence in several species including *Arabidopsis thaliana*, *Arabidopsis lyrata subsp. Lyrata*, *Arachis ipaensis*, *Brassica napus*, *Cicer arietinum*, *Eutrema salsugineum*, *Glycine max*, *Rosa chinensis*, *Prunus persica*, *Prunus avium* and *Prunus dulcis*. Bootstrap value from 500 replicates indicated at each node, using MEGA software version 7. The scale bar represents the branch length.

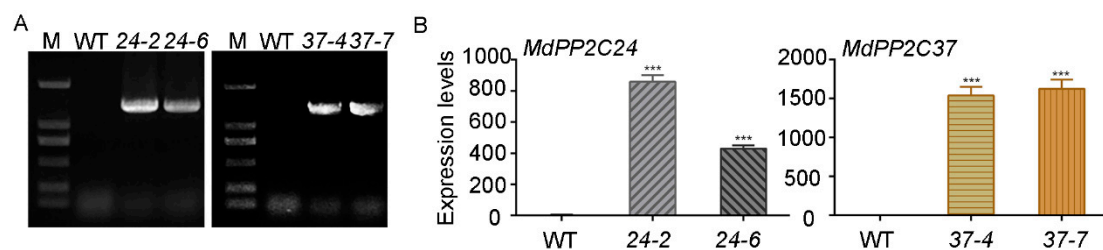

**Figure S2.** Identification of the *MdPP2C24/37* overexpression lines in *Arabidopsis*. (A-B) RT-PCR analysis on the DNA (A) and RNA (B) levels proved that the *MdPP2C24/37* overexpressed in *Arabidopsis* successfully. The expression levels are presented as relative units with the levels of control being taken as 1. Results are means  $\pm$  SE from 3 independent experiments. All experiments were replicated three times, with the same results obtained.

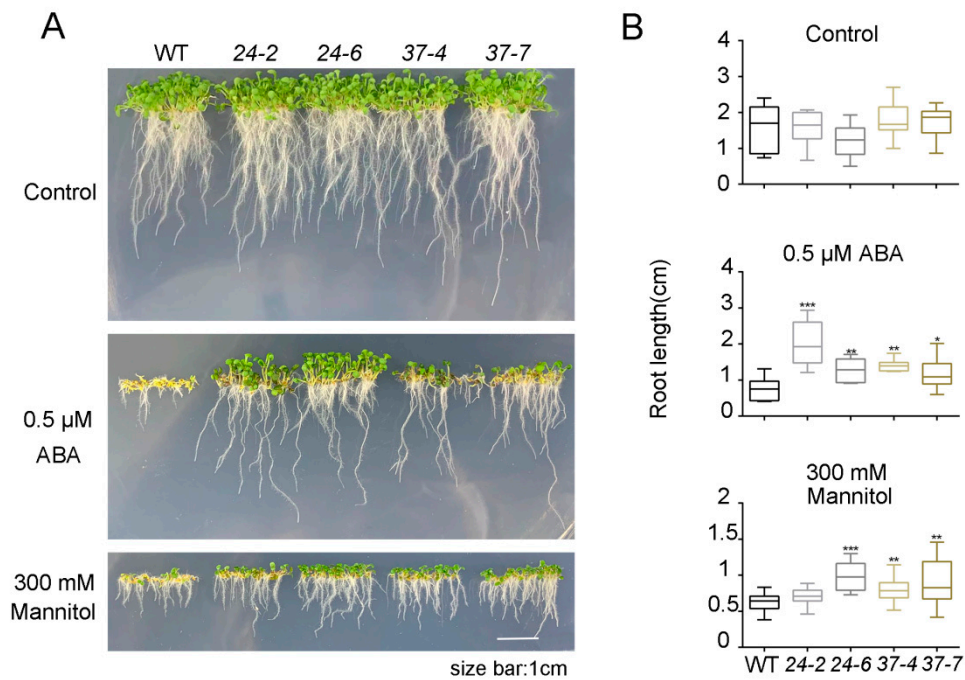

**Figure S3.** Phenotypic analysis of overexpression of *MdPP2C24/37* in *Arabidopsis* found that it has a hyposensitive phenotype to ABA or mannitol at seedling establishment stage. (A) Representative images of morphology of roots length, (B) roots length statistics of WT and the *MdPP2C24/37* overexpression seeds were cultivated 7 d after seeds were sowed in 1/2 MS medium vertically with medium supplemented with 0, 0.5  $\mu$ M ABA or 300 mM mannitol. Results are means  $\pm$  SD from 3 independent experiments. All experiments were replicated three times, with the same results obtained.

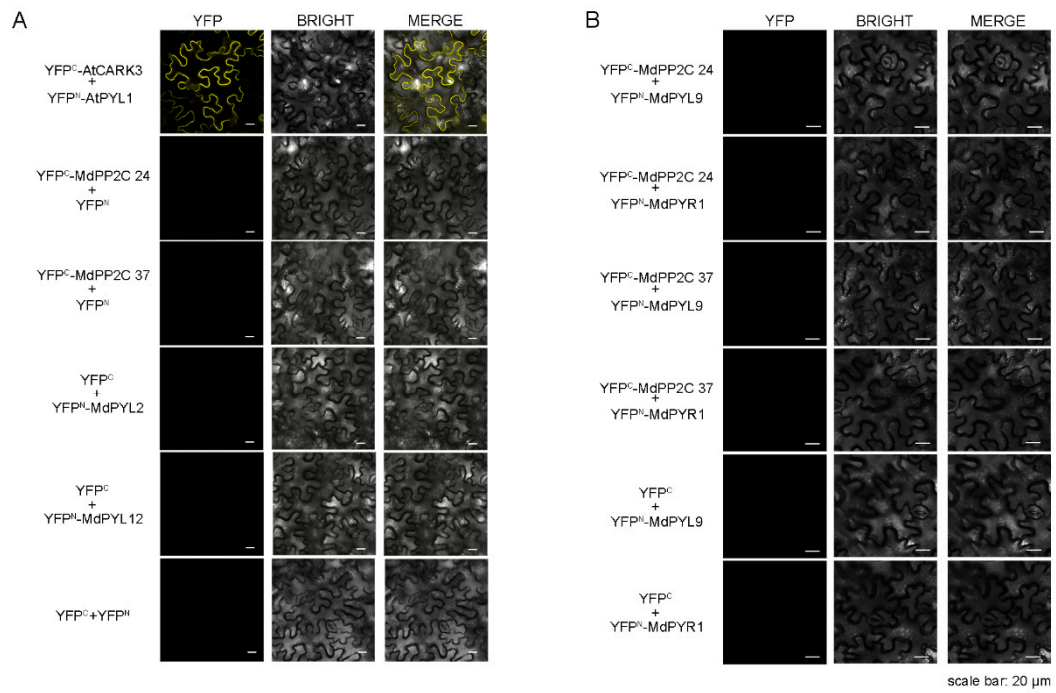

**Figure S4.** Positive control and negative results using bimolecular fluorescence complementation (BiFC) assay of this study. (A) The interaction of YFP<sup>C</sup>-AtCARK3+YFP<sup>N</sup>-AtPYL1 was used as positive control. The interaction of YFP<sup>C</sup>-MdPP2C24/37+YFP<sup>N</sup> and YFP<sup>C</sup>+YFP<sup>N</sup>-MdPYL2/12 and YFP<sup>C</sup>+YFP<sup>N</sup> were used as negative controls. (B) The interactions of YFP<sup>C</sup>-MdPP2C24/37+YFP<sup>N</sup>-MdPYL9/PYR1 were used as negative results. All experiments were replicated three times, with the same results obtained.

**Table S1. List of Primers Used in This Study.**

| Primer's name     | Primer sequences (5'→3')              |                                                         |
|-------------------|---------------------------------------|---------------------------------------------------------|
| RT-qPCR           |                                       |                                                         |
| <i>MdPP2C24 F</i> | GCGGTTCAAATTCGTCTCCG                  |                                                         |
| <i>MdPP2C24 R</i> | TTTCCAAC TCCGAGAAGGC                  |                                                         |
| <i>MdPP2C37 F</i> | AGTTCTTGCCATGTCGAGGG                  |                                                         |
| <i>MdPP2C37 R</i> | GCAGGCGGTGTCGTTAGATA                  |                                                         |
| <i>RAB18 F</i>    | CAGCAGCAGTATGACGAGTA                  |                                                         |
| <i>RAB18 R</i>    | CAGTTCCAAAGCCTTCAGTC                  |                                                         |
| <i>ERD10-F</i>    | TCTCTGAACCAGAGTCGTTT                  |                                                         |
| <i>ERD10-R</i>    | CTTCTTCTCACCGTCTTCAC                  |                                                         |
| <i>RD29A F</i>    | ATCACTTGGCTCCACTGTTGTTC               |                                                         |
| <i>RD29A R</i>    | ACAAAACACACATAAACATCCAAAGT            |                                                         |
| <i>KIN2 F</i>     | ACCAACAAGAATGCCTTCCA                  |                                                         |
| <i>KIN2 R</i>     | ACTGCCGCATCCGATATACT                  |                                                         |
| <i>ACTIN2 F</i>   | TTGACTACGAGCAGGAGATGG                 |                                                         |
| <i>ACTIN2 R</i>   | ACAAACGAGGGCTGGAACAAG                 |                                                         |
| <i>MdEF-1α-F</i>  | ATTCAAGTATGCCTGGGTGC                  |                                                         |
| <i>MdEF-1α-R</i>  | CAGTCAGCCTGTGATGTTCC                  |                                                         |
| Plasmid Construct | Primer's name                         | Construct's name                                        |
| <i>MdPP2C24 F</i> | GCTCTAGAATGGCGGAGACTTGCTACG           | pBI221- <i>p35S:: MdPP2C24-GFP</i><br><i>XbaI/SmaI</i>  |
| <i>MdPP2C24 R</i> | TCCCCCGGGCGCGTGTTCGCTCTGAGGT          |                                                         |
| <i>MdPP2C37 F</i> | GCTCTAGAATGGCTGGAATGTGCTGCGG          | pBI221- <i>p35S:: MdPP2C37-GFP</i><br><i>XbaI/SmaI</i>  |
| <i>MdPP2C37 R</i> | TCCCCCGGGCGGGACCTCCCCGGTCTTCT         |                                                         |
| <i>MdPP2C24 F</i> | GCTCTAGAATGGCGGAGACTTGCTACG           | pCambia2300- <i>p35S:: MdPP2C24</i><br><i>XbaI/KpnI</i> |
| <i>MdPP2C24 R</i> | CCGGTACCCGTGTTGCGTCTGAGGT             |                                                         |
| <i>MdPP2C37 F</i> | GCTCTAGAATGGCTGGAATGTGCTGCGG          | pCambia2300- <i>p35S:: MdPP2C37</i><br><i>XbaI/KpnI</i> |
| <i>MdPP2C37 R</i> | CCGGTACCGGACCTCCCCGGTCTTCT            |                                                         |
| <i>MdPP2C24 F</i> | GGAATTCCATATGATGGCGGAGACTTGCTACG      | PGBKT7 (AD)-MdPP2C24<br><i>NdeI/EcoRI</i>               |
| <i>MdPP2C24 R</i> | CGGAATTCTTACGTGTTGCGTCTGAGGT          |                                                         |
| <i>MdPP2C37 F</i> | GGAATTCCATATGATGGCTGGAATGTGCTGCGG     | PGBKT7 (AD)-MdPP2C37<br><i>NdeI/EcoRI</i>               |
| <i>MdPP2C37 R</i> | CGGAATTCTTAGGACCTCCCCGGTCTTCT         |                                                         |
| <i>MdPYL2 F</i>   | CGGAATTCATGGATGCTAGCTCCGCTC           | PGADT7 (BD)-MdPYL2<br><i>EcoRI/PstI</i>                 |
| <i>MdPYL2 R</i>   | AAAAC TGCAGTGATTGATCATGTCTCCCC        |                                                         |
| <i>MdPYL9 F</i>   | TCCCCCGGGATGAGCATCGGCGGCGG            | PGADT7 (BD)-MdPYL9<br><i>XmaI/PstI</i>                  |
| <i>MdPYL9 R</i>   | AAAAC TGCAGCTATTGATTGATAGGTTTCGGTTCGG |                                                         |
| <i>MdPYL12 F</i>  | GGAATTCCATATGATGTCGTACCCAACGTCCCA     | PGADT7 (BD)-MdPYL12                                     |

|                   |                               |                                            |
|-------------------|-------------------------------|--------------------------------------------|
| <i>MdPYL12 R</i>  | CGGAATTCTCAGCACGTAGCAGCCATC   | <i>NdeI/EcoRI</i>                          |
| <i>MdPYR F</i>    | TCCCCCGGGATGGAGAAAAGCGAGGGC   | PGADT7 (BD)-MdPYR1<br><i>XmaI/PstI</i>     |
| <i>MdPYR R</i>    | AAAACCTGCAGTTAGCGCCACCGTCAC   |                                            |
| <i>MdPP2C24 F</i> | GCTCTAGAATGGCGGAGACTTGCTACG   | PSPYNE/PSPYCE-MdPP2C24<br><i>XbaI/KpnI</i> |
| <i>MdPP2C24 R</i> | CCGGTACCCGTGTTGCGTCTGAGGT     |                                            |
| <i>MdPP2C37 F</i> | GCTCTAGAATGGCTGGAATGTGCTGCGG  | PSPYNE/PSPYCE-MdPP2C37<br><i>XbaI/KpnI</i> |
| <i>MdPP2C37 R</i> | CCGGTACCGGACCTCCCCGGTCTTCT    |                                            |
| <i>MdPYL2 F</i>   | GCTCTAGAATGGATGCTAGCTCCGCTC   | PSPYNE/PSPYCE-MdPYL2<br><i>XbaI/KpnI</i>   |
| <i>MdPYL2 R</i>   | GGGGTACCTGATTGATCATGTCCTCCCCC |                                            |
| <i>MdPYL12 F</i>  | GCTCTAGAATGTCTGTACCCAACGTCCCA | PSPYNE/PSPYCE-MdPYL12<br><i>XbaI/KpnI</i>  |
| <i>MdPYL12 R</i>  | GGGGTACCGCACGTAGCAGCCATC      |                                            |
